# Supplementary material for: An Ultra-Stretchable Sensitive Hydrogel Sensor for Human Motion and Pulse Monitoring
Source: MDPI journal article supplement (doi:10.3390/mi12070789), 2021-07-01
Supplement: s1 [file s1]

## Supporting Information

### An Ultra-stretchable Sensitive Hydrogel Sensor for Human Motion and Pulse Monitoring

Bin Shen, Jiang Li, Yongtao Tang, Huihua Xu\* and Fengyu Li\*

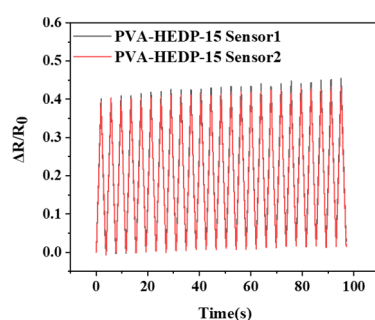

**Figure S1.** Response of the PVA-HEDP-15 hydrogel sensors fabricated from two identical molds to cyclic loading-unloading of 20% strain.

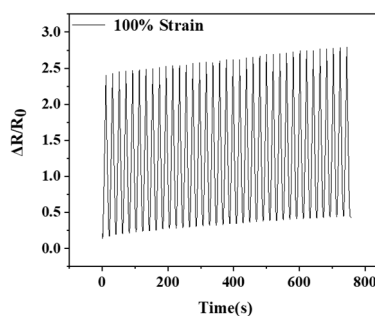

**Figure S2.** Response of the hydrogel to cyclic loading-unloading of 100% strain.
